# Supplementary material for: Intermediate risk of multidrug-resistant organisms in patients who admitted intensive care unit with healthcare-associated pneumonia
Source: PubMed Central journal article supplement — Korean J Intern Med. 2016 Mar 11;31(3):525–34. doi: 10.3904/kjim.2015.103 (PMC4855101; doi:10.3904/kjim.2015.103), 2016-03-11
Supplement: kjim-2015-103-supple1.pdf [file kjim-2015-103-supple1.pdf]

**Supplementary Table 1. Subgroups of healthcare-acquired pneumonia**

| Variable                                           | HCAP <sub>1</sub><br>(n = 37) <sup>a</sup> | HCAP <sub>2</sub><br>(n = 35) <sup>b</sup> | HCAP <sub>3</sub><br>(n = 37) <sup>c</sup> | HCAP <sub>4</sub><br>(n = 8) <sup>d</sup> | Subgroup ≥ 2<br>(n = 32) |
|----------------------------------------------------|--------------------------------------------|--------------------------------------------|--------------------------------------------|-------------------------------------------|--------------------------|
| APACHE II                                          | 27.03 ± 9.64                               | 27.06 ± 11.42                              | 25.84 ± 9.64                               | 28.25 ± 11.67                             | 26.31 ± 9.47             |
| SOFA                                               | 9.16 ± 3.93                                | 9.51 ± 4.15                                | 9.41 ± 4.37                                | 12.13 ± 4.67                              | 9.47 ± 4.24              |
| PSI risk class ≥ IV                                | 36 (97.3)                                  | 34 (47.9)                                  | 36 (97.3)                                  | 8 (100)                                   | 32 (100)                 |
| CURB-65 ≥ 3                                        | 18 (48.6)                                  | 16 (45.7)                                  | 16 (43.2)                                  | 7 (87.5)                                  | 16 (50)                  |
| Gram positive pathogen                             | 10 (27.0)                                  | 4 (11.4)                                   | 11 (29.7)                                  | 1 (12.5)                                  | 7 (21.9)                 |
| Gram negative pathogen                             | 18 (48.2)                                  | 17 (48.6)                                  | 16 (43.2)                                  | 3 (37.5)                                  | 14 (43.8)                |
| MDR                                                | 9 (24.3)                                   | 7 (20.0)                                   | 12 (32.4)                                  | 1 (12.5)                                  | 9 (28.1)                 |
| MRSA                                               | 4 (10.4)                                   | 2 (5.7)                                    | 6 (16.2)                                   | 0                                         | 3 (9.4)                  |
| ESBL producing <i>Enterobacteriae</i> <sup>e</sup> | 6 (16.2)                                   | 4 (11.4)                                   | 5 (13.5)                                   | 1 (12.5)                                  | 5 (15.6)                 |
| Treatment failure                                  | 12 (32.4)                                  | 11 (31.4)                                  | 13 (35.1)                                  | 5 (62.5)                                  | 12 (37.5)                |
| Duration                                           |                                            |                                            |                                            |                                           |                          |
| ICU                                                | 9.4                                        | 9.3                                        | 11.7                                       | 7.6                                       | 8.9                      |
| ICU free days <sup>f</sup>                         | 17.9                                       | 18                                         | 15.3                                       | 25                                        | 17.8                     |
| Mortality                                          |                                            |                                            |                                            |                                           |                          |
| ICU                                                | 9 (24.3)                                   | 10 (28.6)                                  | 4 (10.8)                                   | 3 (37.5)                                  | 7 (21.9)                 |
| Hospital                                           | 18 (48.6)                                  | 15 (42.9)                                  | 9 (24.3)                                   | 4 (50.0)                                  | 13 (40.6)                |

Values are presented as mean ± SD or number (%).

HCAP, healthcare-acquired pneumonia; APACHE II, Acute Physiology and Chronic Health Evaluation II; SOFA, Sequential Organ Failure Assessment; PSI, pneumonia severity index; CURB-65, confusion, urea, respiratory rate, age ≥ 65; MDR, multi-drug-resistant; MRSA, methicillin-resistant *Staphylococcus aureus*; ESBL, extended-spectrum β-lactamase; ICU, intensive care unit.

<sup>a</sup>Hospitalization in an acute care hospital for 2 or more days within 90 days of the infection.

<sup>b</sup>Infusion therapy, such as intravenous antibiotic therapy, chemotherapy, or wound care, within 30 days of a current infection.

<sup>c</sup>Residence in a nursing home or long-term care facility.

<sup>d</sup>Regular attendance at a dialysis clinic, including hemodialysis and peritoneal dialysis.

<sup>e</sup>ESBL producing *Enterobacteriae* include *Klebsiella pneumoniae*, *Escherichia coli*, *Enterobacter* spp.

<sup>f</sup>ICU free days refers to the period from ICU discharge to hospital discharge.
