# Supplementary material for: Intermediate risk of multidrug-resistant organisms in patients who admitted intensive care unit with healthcare-associated pneumonia
Source: PubMed Central journal article supplement — Korean J Intern Med. 2016 Mar 11;31(3):525–34. doi: 10.3904/kjim.2015.103 (PMC4855101; doi:10.3904/kjim.2015.103), 2016-03-11
Supplement: kjim-2015-103-supple2.pdf [file kjim-2015-103-supple2.pdf]

**Supplementary Table 2. Subgroups of hospital-acquired pneumonia (n = 46)**

| Variable                        | No. (%)   |
|---------------------------------|-----------|
| Aspiration pneumonia            | 21 (15.6) |
| Ventilator associated pneumonia | 9 (19.6)  |
| Postoperative pneumonia         | 4 (8.7)   |
| Other pneumonia <sup>a</sup>    | 12 (26.0) |

<sup>a</sup>Other pneumonia means hospital-acquired pneumonia without specific situation such aspiration or postoperation.
